# Supplementary material for: Nurses’ perceptions of and satisfaction with the use of automated dispensing cabinets at the Heart and Cancer Centers in Qatar: a cross-sectional study
Source: PubMed Central journal article supplement (PMC4712505; doi:10.1186/s12912-015-0121-7), 2016-01-14
Supplement: 12912_2015_121_MOESM1_ESM.pdf [file 12912_2015_121_MOESM1_ESM.pdf]

## Automated Dispensing Cabinet Satisfaction Survey

This is a satisfaction survey concerns the use of automated dispensing cabinets (PYXIS) in relation to pharmacy services provided to nursing for patient care. Please circle the one that best represent your opinion. The information will be used for the purpose of improving the quality of medication delivery system.

What is your title:

- Staff Nurse                     
  Charge Nurse   
  Head Nurse      
  Other

Nursing Unit:-----

Number of Beds:-----

Nurse Per Patient Ratio:----

### A. Personal Details:

1. Nursing Degree:

- Diploma                     
  BSc Nursing   
  MSc                     
  Other

2. Years of experience:

- 1 – 5 years                     
  5 – 10 years      
  10 – 15 years      
  More than 15 years

4. Have you worked with Pyxis before joining Heart Hospital?

- Yes                             
  No

### B. System Use:

1. From logging in to actually withdrawing the medications you need, how easy is the process?

- Very easy                     
  Easy                     
  Somewhat easy      
  Not easy

2. When have you started using Pyxis at the Heart Hospital?

- 1 – 3 months                     
  3 – 6 months      
  6 – 9 month                     
  Never used the system

3. How would rate your satisfaction with PYXIS?

- Very satisfied                     
  Satisfied                     
  Somewhat satisfied      
  Not satisfied

### C. Answer the following questions by choosing one of the following:

**- Strongly Agree**

**- Agree**

**- Disagree**

**- Strongly Disagree**

| # | Question                                                           | Strongly Agree           | Agree                    | Neutral                  | Disagree                 | Strongly Disagree        |
|---|--------------------------------------------------------------------|--------------------------|--------------------------|--------------------------|--------------------------|--------------------------|
| 1 | Medications are more readily available?                            | <input type="checkbox"/> | <input type="checkbox"/> | <input type="checkbox"/> | <input type="checkbox"/> | <input type="checkbox"/> |
| 2 | The medication delivery system allows me to do my job more safely? | <input type="checkbox"/> | <input type="checkbox"/> | <input type="checkbox"/> | <input type="checkbox"/> | <input type="checkbox"/> |

## Automated Dispensing Cabinet Satisfaction Survey

- |    |                                                                                                  |                          |                          |                          |                          |                          |
|----|--------------------------------------------------------------------------------------------------|--------------------------|--------------------------|--------------------------|--------------------------|--------------------------|
| 3  | There are rarely discrepancies when doing narcotic counts.                                       | <input type="checkbox"/> | <input type="checkbox"/> | <input type="checkbox"/> | <input type="checkbox"/> | <input type="checkbox"/> |
| 4  | I have access to all of the medications I need.                                                  | <input type="checkbox"/> | <input type="checkbox"/> | <input type="checkbox"/> | <input type="checkbox"/> | <input type="checkbox"/> |
| 5  | I am able to get all of my medications in one place.                                             | <input type="checkbox"/> | <input type="checkbox"/> | <input type="checkbox"/> | <input type="checkbox"/> | <input type="checkbox"/> |
| 6  | I rarely have to wait in line to get my patient medications.                                     | <input type="checkbox"/> | <input type="checkbox"/> | <input type="checkbox"/> | <input type="checkbox"/> | <input type="checkbox"/> |
| 7  | Refrigerated medications are easily accessible.                                                  | <input type="checkbox"/> | <input type="checkbox"/> | <input type="checkbox"/> | <input type="checkbox"/> | <input type="checkbox"/> |
| 8  | It is easy to obtain medications during an emergency.                                            | <input type="checkbox"/> | <input type="checkbox"/> | <input type="checkbox"/> | <input type="checkbox"/> | <input type="checkbox"/> |
| 9  | The physical layout of the system is user friendly.                                              | <input type="checkbox"/> | <input type="checkbox"/> | <input type="checkbox"/> | <input type="checkbox"/> | <input type="checkbox"/> |
| 10 | All drawers' types assures safety access and removal of medications                              | <input type="checkbox"/> | <input type="checkbox"/> | <input type="checkbox"/> | <input type="checkbox"/> | <input type="checkbox"/> |
| 11 | I can use the system confidently after minimal training.                                         | <input type="checkbox"/> | <input type="checkbox"/> | <input type="checkbox"/> | <input type="checkbox"/> | <input type="checkbox"/> |
| 12 | The training materials provided were informative & adequate.                                     | <input type="checkbox"/> | <input type="checkbox"/> | <input type="checkbox"/> | <input type="checkbox"/> | <input type="checkbox"/> |
| 13 | Did you view the PYXIS video prior to Go-Live?                                                   | <input type="checkbox"/> | <input type="checkbox"/> | <input type="checkbox"/> | <input type="checkbox"/> | <input type="checkbox"/> |
| 14 | I was adequately trained by a PYXIS representative or a super-user nurse prior to Go-Live?       | <input type="checkbox"/> | <input type="checkbox"/> | <input type="checkbox"/> | <input type="checkbox"/> | <input type="checkbox"/> |
| 15 | The system would work better if more meds were in the PYXIS system?                              | <input type="checkbox"/> | <input type="checkbox"/> | <input type="checkbox"/> | <input type="checkbox"/> | <input type="checkbox"/> |
| 16 | I am able to administer meds more efficiently (on time, right dose, etc.) with the PYXIS system. | <input type="checkbox"/> | <input type="checkbox"/> | <input type="checkbox"/> | <input type="checkbox"/> | <input type="checkbox"/> |
| 17 | I am able to select the best                                                                     |                          |                          |                          |                          |                          |

## Automated Dispensing Cabinet Satisfaction Survey

available strength of ordered medication

- 18 I now spend less time waiting for medications that come from pharmacy than before PYXS was installed.
- 19 The amount of time between when a written order is sent to Pharmacy and when it is available from the PYXIS system is acceptable.
- 20 The number of phone calls to the pharmacy requesting missing medications is acceptable?
- 21 Pharmacy personnel have been responsive in answering questions and/or resolving issues.

### D. Suggestions:

1. What do you like the most about PYXIS system?

- 1.
- 2.
- 3.

2. What do you like the least about PYXIS system?

- 1.
- 2.
- 3.

3. Do you have any suggestions for improving the system?

- 1.
- 2.
- 3.
